# Supplementary material
Source: HighWire-hosted journal article supplement (http://www.cmaj.ca/highwire/filestream/58918/field_highwire_adjunct_files/0/five-wernicke-1-at.pdf)
Supplement: five-wernicke-1-at.pdf [file five-wernicke-1-at.pdf]

## Appendix 1: References

1. Galvin R, Brathen G, Ivashynka A, et al. EFNS guidelines for diagnosis, therapy and prevention of Wernicke encephalopathy. *Eur J Neurol* 2010;17:1408-18.
2. Victor M, Adams RD, Collins GH. The Wernicke–Korsakoff syndrome. A clinical and pathological study of 245 patients, 82 with post-mortem examinations. *Contemp Neurol Ser* 1971;7:1-206.
3. Caine D, Halliday G, Kreil J, et al. Operational criteria for classification of chronic alcoholics: identification of Wernicke’s encephalopathy. *J Neurol Neurosurg Psychiatry* 1997;62:51-60.
4. Thomson AD, Cook CC, Touquet R, et al. The Royal College of Physicians report on alcohol: guidelines for managing Wernicke’s encephalopathy in the accident and emergency department. *Alcohol Alcohol* 2002;37:513-21.
5. Day E, Bentham P, Callaghan R, et al. Thiamine for Wernicke-Korsakoff syndrome in people at risk from alcohol abuse. *Cochrane Database Syst Rev* 2004(1):CD004033.
